# Supplementary material for: Production of Alginate Oligosaccharides (AOSs) Using Enhanced Physicochemical Properties of Immobilized Alginate Lyase for Industrial Application
Source: MDPI journal article supplement (doi:10.3390/md22030120), 2024-03-04
Supplement: s1 [file s1]

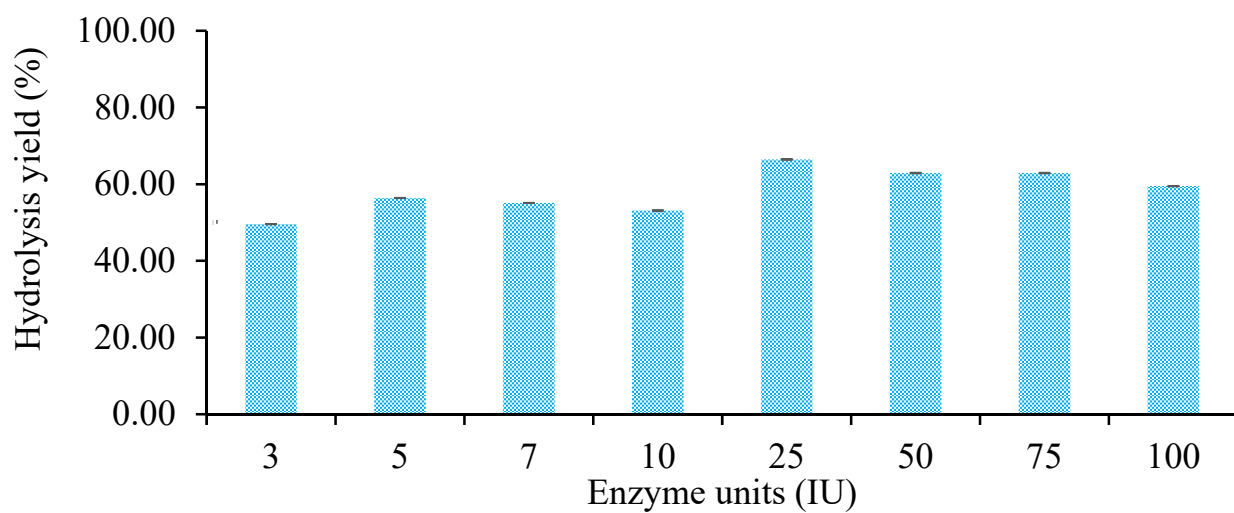

Figure S1. Effect of increasing concentration of enzyme units (International units: IU) on the hydrolysis yield of alginate by alginate lyase

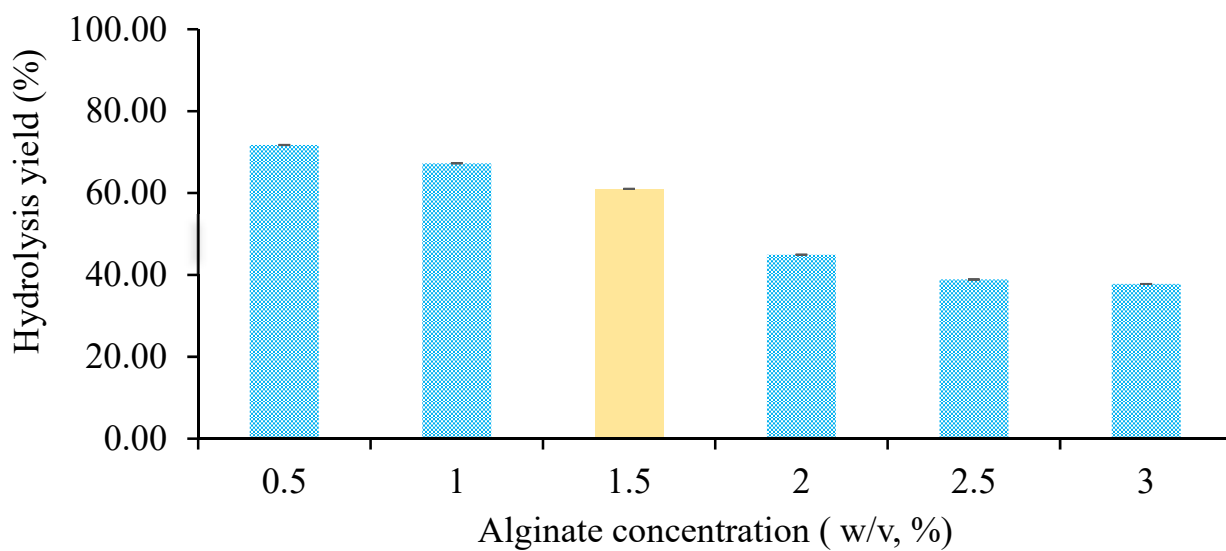

Figure S2. Effect of increasing substrate concentration on the hydrolysis yield of alginate by alginate lyase

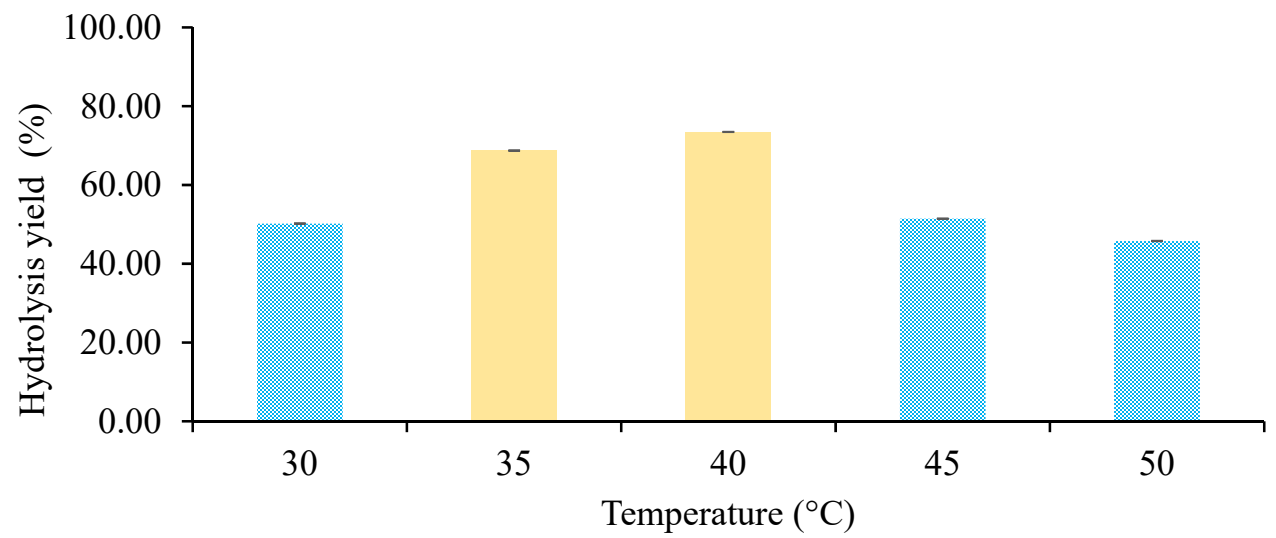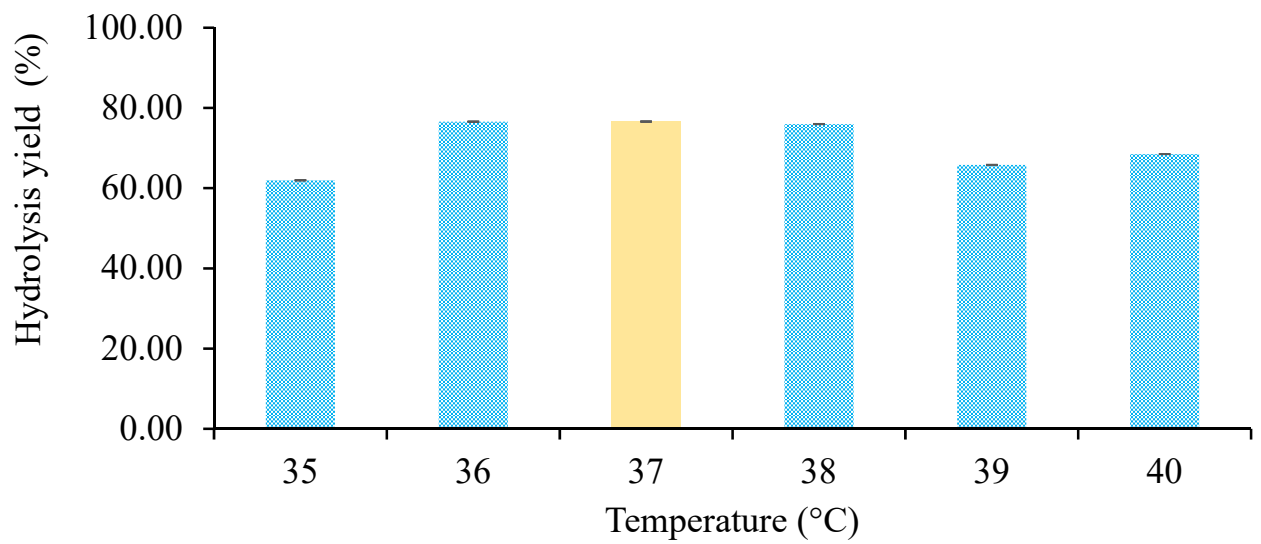

Figure S3. Effect of temperature (a: wide range, b: narrow range) on the hydrolysis yield of alginate by alginate lyase

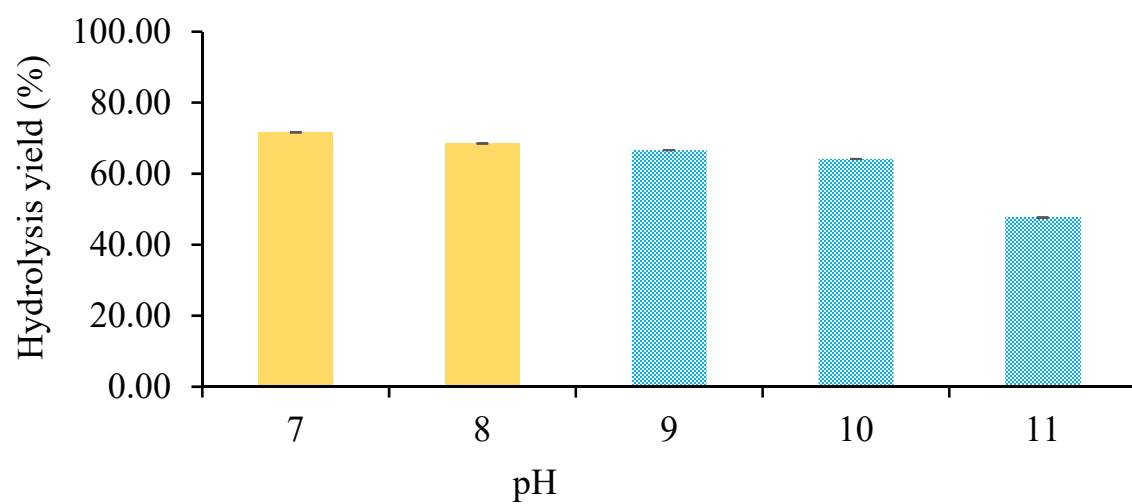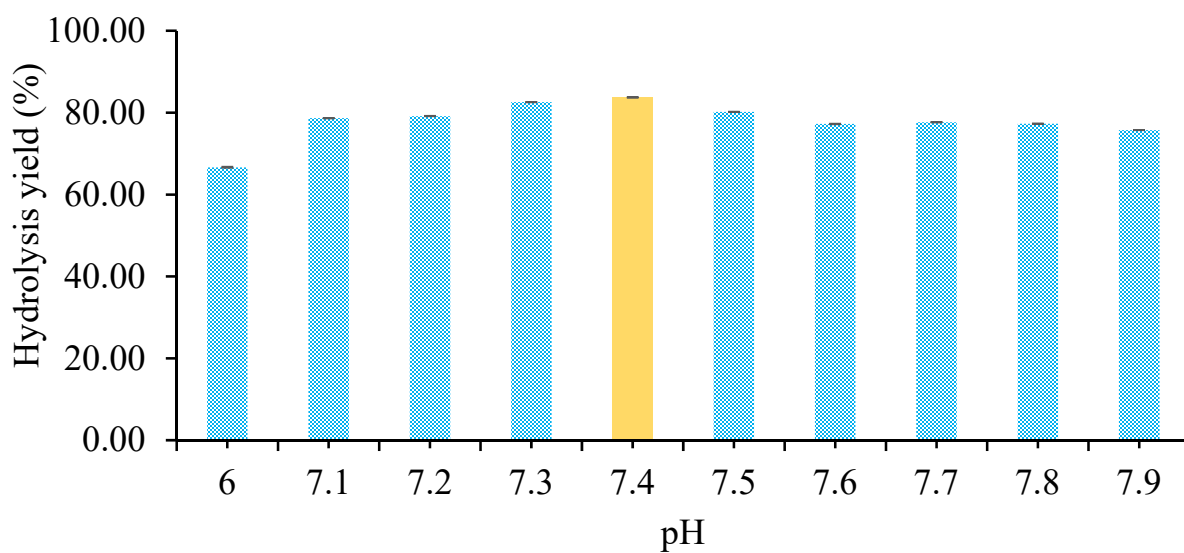

Figure S4. Effect of pH (a: wide range, b: narrow range) on the hydrolysis yield of alginate by alginate lyase

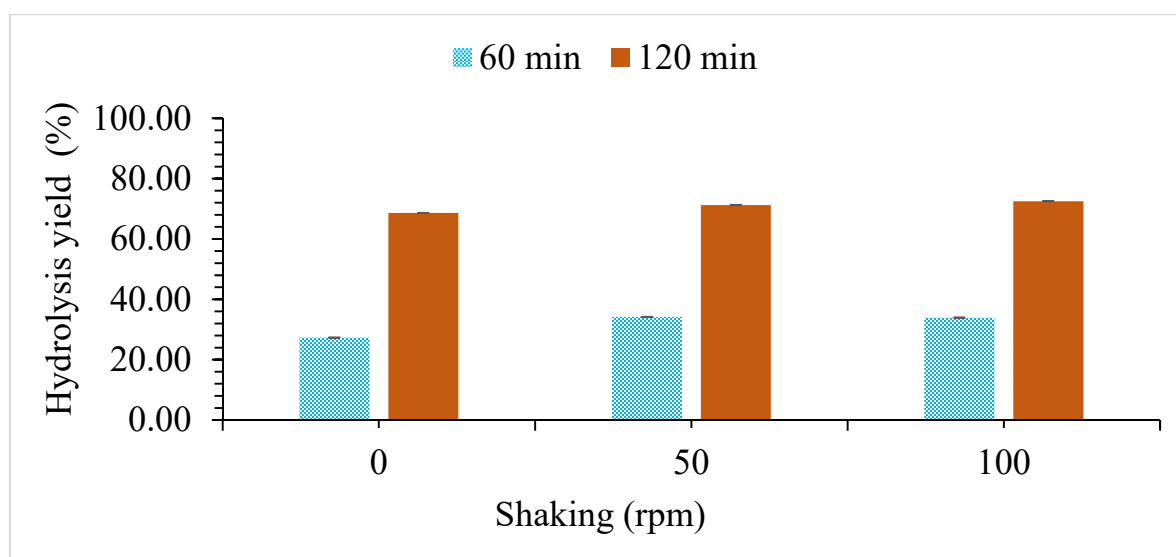

Figure S5. Effect of shaking and time of incubation on the hydrolysis yield of alginate by alginate lyase
